# Supplementary material for: Carbon Metabolism of a Soilborne Mn(II)-Oxidizing Escherichia coli Isolate Implicated as a Pronounced Modulator of Bacterial Mn Oxidation
Source: MDPI journal article supplement (doi:10.3390/ijms23115951), 2022-05-25
Supplement: s1 [file s1]

## Supplementary Material

# Carbon metabolism of a soilborne Mn(II)-oxidizing *Escherichia coli* isolate implicated as a pronounced modulator of bacterial Mn oxidation

Tong Gu<sup>1</sup>, Zhenghu Tong<sup>1</sup>, Xue Zhang<sup>1</sup>, Zhiyong Wang<sup>1,2</sup>, Zhen Zhang<sup>1,3</sup>, Tzann-Shun Hwang<sup>4,\*</sup> and Lin Li<sup>1,\*</sup>

<sup>1</sup> State Key Laboratory of Agricultural Microbiology, College of Life Science and Technology, Huazhong Agricultural University, Wuhan 430070, China; gutong1117@webmail.hzau.edu.cn (T.G.); tong123@webmail.hzau.edu.cn (Z.T.); 2019zx@webmail.hzau.edu.cn (X.Z.)

<sup>2</sup> Key Laboratory of Biological Resources Protection and Utilization of Hubei Province, Hubei Minzu University, Enshi 445000, China; wangzhiyong@hbmzu.edu.cn

<sup>3</sup> College of Food and Bioengineering, Henan University of Animal Husbandry and Economy, Zhengzhou 450046, China; zhzh217@163.com

<sup>4</sup> Graduate Institute of Biotechnology, Chinese Culture University, Taipei 11114, Taiwan

\* Correspondence: lilin@mail.hzau.edu.cn (L. L.) and hzx@faculty.pccu.edu.tw (T.-S.H.).

## Supplementary Tables

**Table S1. Strains used in this study**

| Strain                           | Relevant characteristic(s) <sup>a</sup>                                                                                                                      | Sources            |
|----------------------------------|--------------------------------------------------------------------------------------------------------------------------------------------------------------|--------------------|
| <i>Escherichia coli</i> Mach1-T1 | F <sup>+</sup> $\phi$ 80( <i>lac Z</i> ) $\Delta$ <i>m15</i> $\Delta$ <i>lacX74</i> <i>hsdR</i> ( <i>rkmk</i> +) $\Delta$ <i>recA</i> 1398 <i>endA1 tonA</i> | Laboratory stock   |
| <i>Escherichia coli</i> MB266    | A highly reactive Mn(II)-oxidizing bacterial isolate                                                                                                         | Zhang et al., 2015 |
| $\Delta$ <i>pykF</i>             | MB266 with in-frame deletion of <i>pykF</i>                                                                                                                  | This study         |
| $\Delta$ <i>ptsI</i>             | MB266 with in-frame deletion of <i>ptsI</i>                                                                                                                  | This study         |
| $\Delta$ <i>pps</i>              | MB266 with in-frame deletion of <i>pps</i>                                                                                                                   | This study         |
| $\Delta$ <i>ptsP</i>             | MB266 with in-frame deletion of <i>ptsP</i>                                                                                                                  | This study         |
| $\Delta$ <i>cysE</i>             | MB266 with in-frame deletion of <i>cysE</i>                                                                                                                  | This study         |
| $\Delta$ <i>sdaA</i>             | MB266 with in-frame deletion of <i>sdaA</i>                                                                                                                  | This study         |
| $\Delta$ <i>ilvA</i>             | MB266 with in-frame deletion of <i>ilvA</i>                                                                                                                  | This study         |
| $\Delta$ <i>tdcB</i>             | MB266 with in-frame deletion of <i>tdcB</i>                                                                                                                  | This study         |
| $\Delta$ <i>glyB</i>             | MB266 with in-frame deletion of <i>glyB</i>                                                                                                                  | This study         |
| $\Delta$ <i>sfcA</i>             | MB266 with in-frame deletion of <i>sfcA</i>                                                                                                                  | This study         |
| $\Delta$ <i>yqeF</i>             | MB266 with in-frame deletion of <i>yqeF</i>                                                                                                                  | This study         |
| $\Delta$ <i>aceE</i>             | MB266 with in-frame deletion of <i>aceE</i>                                                                                                                  | This study         |
| $\Delta$ <i>ldhA</i>             | MB266 with in-frame deletion of <i>ldhA</i>                                                                                                                  | This study         |
| $\Delta$ <i>ydiJ</i>             | MB266 with in-frame deletion of <i>ydiJ</i>                                                                                                                  | This study         |
| $\Delta$ <i>lpd</i>              | MB266 with in-frame deletion of <i>lpd</i>                                                                                                                   | This study         |
| $\Delta$ <i>katE</i>             | MB266 with in-frame deletion of <i>katE</i>                                                                                                                  | This study         |



---

|               |                                                                                                     |            |
|---------------|-----------------------------------------------------------------------------------------------------|------------|
| $\Delta pyr2$ | $\Delta pyr1$ with in-frame deletion of <i>ptsI</i>                                                 | This study |
| $\Delta pyr3$ | $\Delta pyr2$ with in-frame deletion of <i>ptsP</i>                                                 | This study |
| $\Delta pyr4$ | $\Delta pyr3$ with in-frame deletion of <i>pps</i>                                                  | This study |
| $\Delta gaa1$ | MB266 with in-frame deletion of <i>ilvA</i>                                                         | This study |
| $\Delta gaa2$ | $\Delta gaa1$ with in-frame deletion of <i>tdcB</i>                                                 | This study |
| $\Delta gaa3$ | $\Delta gaa2$ with in-frame deletion of <i>sdaA</i>                                                 | This study |
| $\Delta gaa4$ | $\Delta gaa3$ with in-frame deletion of <i>cysE</i>                                                 | This study |
| $\Delta gly1$ | MB266 with in-frame deletion of <i>yqeF</i>                                                         | This study |
| $\Delta gly2$ | $\Delta gly1$ with in-frame deletion of <i>glcB</i>                                                 | This study |
| $\Delta gly3$ | $\Delta gly2$ with in-frame deletion of <i>sfcA</i>                                                 | This study |
| $\Delta gly4$ | $\Delta gly3$ with in-frame deletion of <i>aceE</i>                                                 | This study |
| $\Delta lac1$ | MB266 with in-frame deletion of <i>ldhA</i>                                                         | This study |
| $\Delta lac2$ | $\Delta lac1$ with in-frame deletion of <i>ydiJ</i>                                                 | This study |
| $\Delta lac3$ | $\Delta lac2$ with in-frame deletion of <i>dld</i>                                                  | This study |
| $\Delta lac4$ | $\Delta lac3$ with in-frame deletion of <i>katE</i>                                                 | This study |
| MB801         | MB266 with in-frame deletion of 4 genes ( <i>ilvA</i> , <i>glcB</i> , <i>yqeF</i> and <i>ldhA</i> ) | This study |

---

**Table S2. Plasmids used in this study**

| Plasmid        | Relevant characteristic (s) <sup>a</sup>                                                               | Sources           |
|----------------|--------------------------------------------------------------------------------------------------------|-------------------|
| pCas9(ts)-NHEJ | Cm <sup>r</sup> , a pUC19 derivative harboring <i>spCas9, ligD, ku, Pj23119, Rep101(ts)</i> , 11323 bp | (Su et al., 2016) |
| pgRNA-bacteria | Sp <sup>r</sup> , a P15A derivative harboring <i>Pj23119, N20, gRNA scaffold</i> , 3833 bp             | (Su et al., 2016) |
| sgRNA-ΔPykF    | pgRNA-bacteria with target N20 sequence of <i>pykF</i>                                                 | This study        |
| sgRNA-ΔPtsI    | pgRNA-bacteria with target N20 sequence of <i>ptsI</i>                                                 | This study        |
| sgRNA-ΔPps     | pgRNA-bacteria with target N20 sequence of <i>pps</i>                                                  | This study        |
| sgRNA-ΔPtsP    | pgRNA-bacteria with target N20 sequence of <i>ptsP</i>                                                 | This study        |
| sgRNA-ΔCysE    | pgRNA-bacteria with target N20 sequence of <i>cysE</i>                                                 | This study        |
| sgRNA-ΔSdaA    | pgRNA-bacteria with target N20 sequence of <i>sdaA</i>                                                 | This study        |
| sgRNA-ΔIlvA    | pgRNA-bacteria with target N20 sequence of <i>ilvA</i>                                                 | This study        |
| sgRNA-ΔTdcB    | pgRNA-bacteria with target N20 sequence of <i>tdcB</i>                                                 | This study        |
| sgRNA-ΔglyB    | pgRNA-bacteria with target N20 sequence of <i>glcB</i>                                                 | This study        |
| sgRNA-ΔSfcA    | pgRNA-bacteria with target N20 sequence of <i>sfcA</i>                                                 | This study        |
| sgRNA-ΔYqeF    | pgRNA-bacteria with target N20 sequence of <i>yqeF</i>                                                 | This study        |
| sgRNA-ΔAceE    | pgRNA-bacteria with target N20 sequence of <i>aceE</i>                                                 | This study        |
| sgRNA-ΔLdhA    | pgRNA-bacteria with target N20 sequence of <i>ldhA</i>                                                 | This study        |
| sgRNA-ΔYdiJ    | pgRNA-bacteria with target N20 sequence of <i>ydiJ</i>                                                 | This study        |
| sgRNA-ΔDld     | pgRNA-bacteria with target N20 sequence of <i>dld</i>                                                  | This study        |
| sgRNA-ΔKatE    | pgRNA-bacteria with target N20 sequence of <i>katE</i>                                                 | This study        |

**Table S3. Primers used in this study**

| Primer       | Sequence(5'-3')           |
|--------------|---------------------------|
| pykF(65)-1   | ctagtatgcgtctgaacttctctca |
| pykF(65)-2   | aaactgagagaagttcagacgcat  |
| ptsI(59)-1   | ctagttgccaaggcatcagcccagc |
| ptsI(59)-2   | aaacgctgggctgatgccttggca  |
| pps(76)-1    | ctagtctacatcattcatgccgagt |
| pps(76)-2    | aaacactcggcatgaatgatgtag  |
| ptsP(365)-1  | ctagtctcattcaggcgtggtgcgc |
| ptsP(365)-2  | aaacgcgcaccacgcctgaatgag  |
| cysE(1408)-1 | ctagttaaagccgaagccagaacgc |
| cysE(1408)-2 | aaacgcgttctggcttcggcttta  |
| sdaA(712)-1  | ctagtcctcatcttccataccgta  |
| sdaA(712)-2  | aaactacggtatgggaagatgagg  |
| ilvA(1185)-1 | ctagtcagcactgctcttaaatt   |
| ilvA(1185)-2 | aaacaatatttaagagcagtgctg  |
| tdcB(1490)-1 | ctagtaagcgaacaacgactggct  |
| tdcB(1490)-2 | aaacagccagtcgttgttcgctt   |
| glcB(26)-1   | ctagtgggaacagggtggacgctg  |
| glcB(26)-2   | aaaccagcgtccagccctgttccc  |
| sfcA(248)-1  | ctagttcgctttatatcccttacgc |

---

|             |                            |
|-------------|----------------------------|
| sfcA(248)-2 | aaacgcgtaaggatataaagcga    |
| yqeF(637)-1 | ctagtggggcggttacggacacctat |
| yqeF(637)-2 | aaacataggtgtccgtaacgcccc   |
| aceE(17)-1  | ctagtatccgatcgaaactcgcgac  |
| aceE(17)-2  | aaacgtcgcgagtttcgatcggat   |
| ldhA(467)-1 | ctagtaaaaccgctaaaactgccaa  |
| ldhA(467)-2 | aaacttggcagtttttagcggtttt  |
| ydiJ(950)-1 | ctagtttgaagagctggagcaaca   |
| ydiJ(950)-2 | aaactgttgctccagctcttgcaa   |
| dld(139)-1  | ctagtaactcaggtcgtggtacttg  |
| dld(139)-2  | aaaccaagtaccacgacctgagtt   |
| katE(320)-1 | ctagttggaatcgtgtagtggtgac  |
| katE(320)-2 | aaacgtcaccactacacgattcca   |

---

## Supplementary Figures

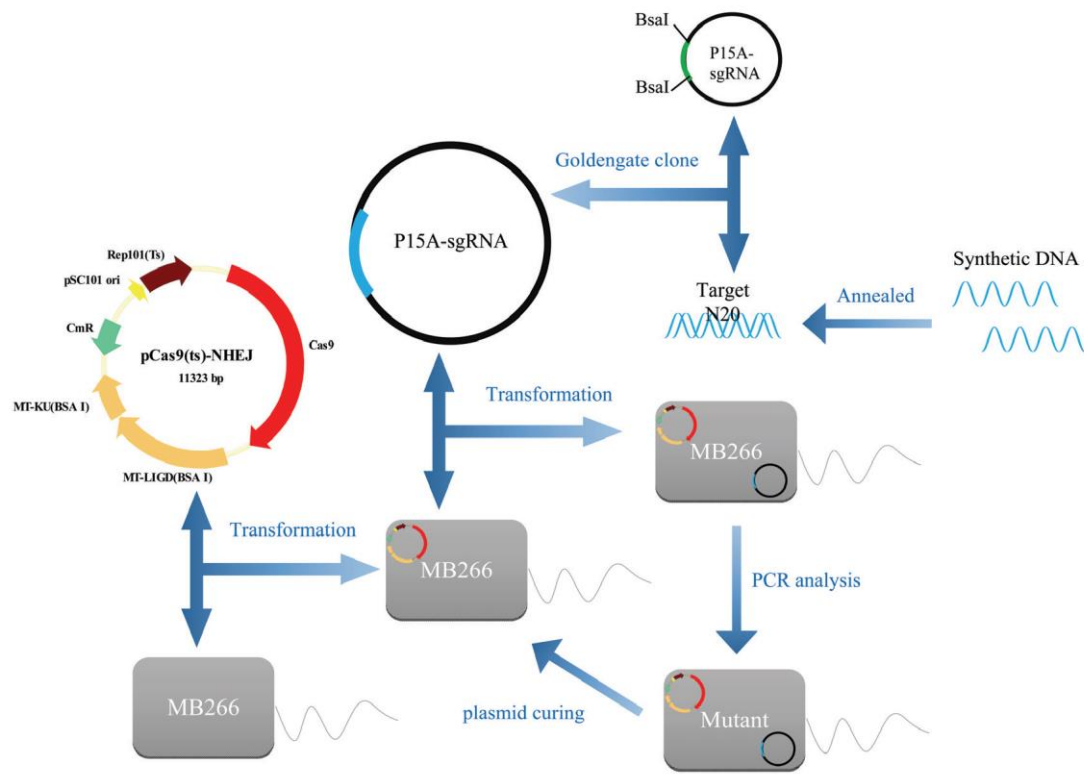

**Figure S1. Schematic illustration of the inactivation of chromosomal genes by CRISPR-Cas9 in MB266.** Mutagenesis is attributed to CRISPR-Cas9 system. First, the specific CRISPR array in plasmid sgRNA-bacteria was generated by the golden gate cloning method. Next, the plasmid pCas9 (Ts)-NHEJ and the plasmid sgRNA-bacteria expressing the specific CRISPR target were transformed by electroporation. Finally, the mutations were confirmed by PCR analysis. To further engineer the strain, the sgRNA donor plasmid is cured via culturing at 42°C with 0.5% SDS for 24 h.
